# Supplementary material for: Lactate Dehydrogenase B Is Required for the Growth of KRAS-Dependent Lung Adenocarcinomas
Source: Oxford University Press journal article supplement (doi:10.1158/1078-0432.ccr-12-2638), 2012-12-07

Supplemental Figure 5: LDHB expression correlates with poor overall survival in lung adenocarcinomas.

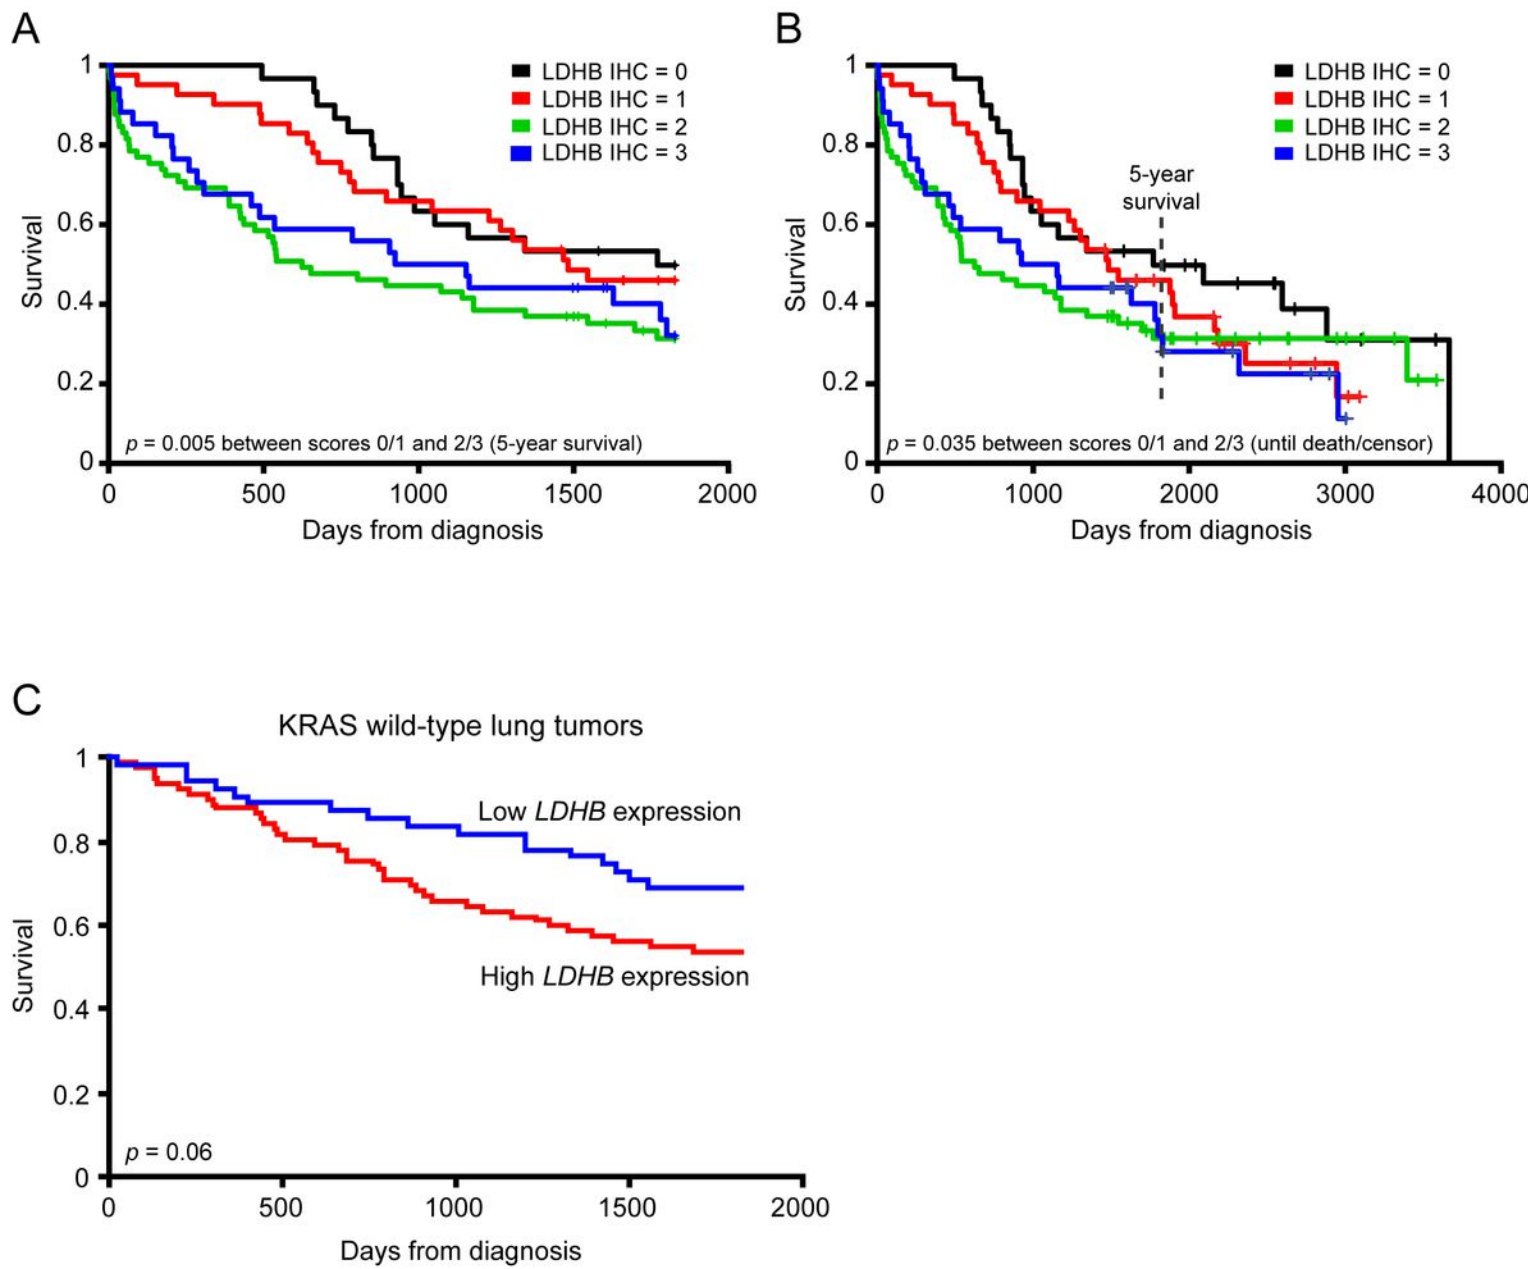

Supplement: 10780432ccr122638-sup-fig5.pdf [file 10780432ccr122638-sup-fig5.pdf]
