# Supplementary figures and images for: Lactate Dehydrogenase B Is Required for the Growth of KRAS-Dependent Lung Adenocarcinomas
Source: Oxford University Press journal article supplement (doi:10.1158/1078-0432.ccr-12-2638), 2012-12-07

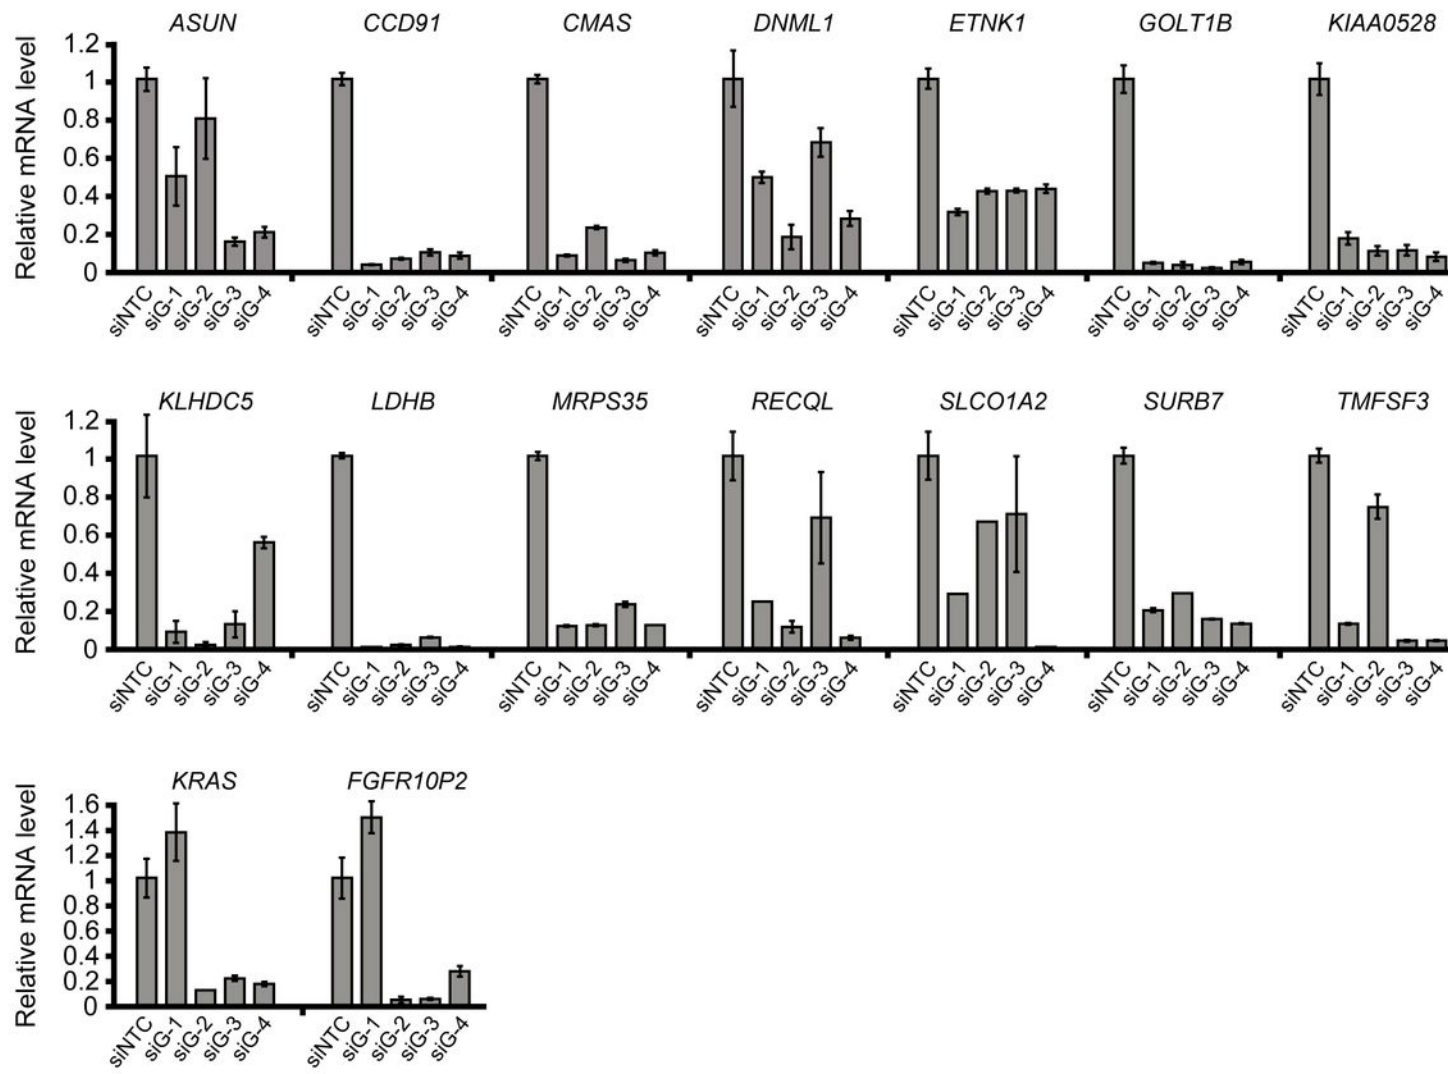

Supplement: 10780432ccr122638-sup-fig1.pdf [file 10780432ccr122638-sup-fig1.pdf]

**A**

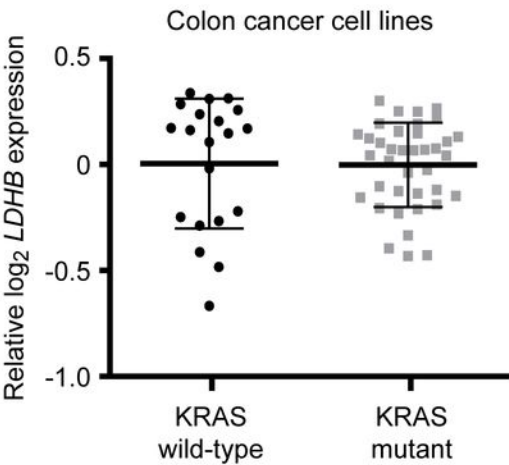

**B**

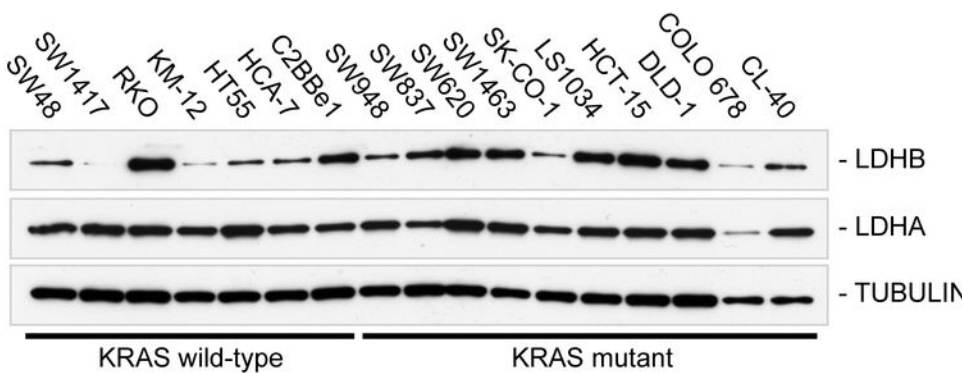

**C**

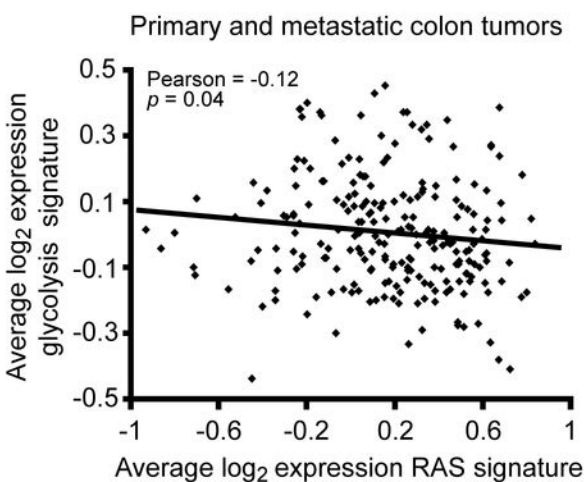

Supplement: 10780432ccr122638-sup-fig2.pdf [file 10780432ccr122638-sup-fig2.pdf]

A

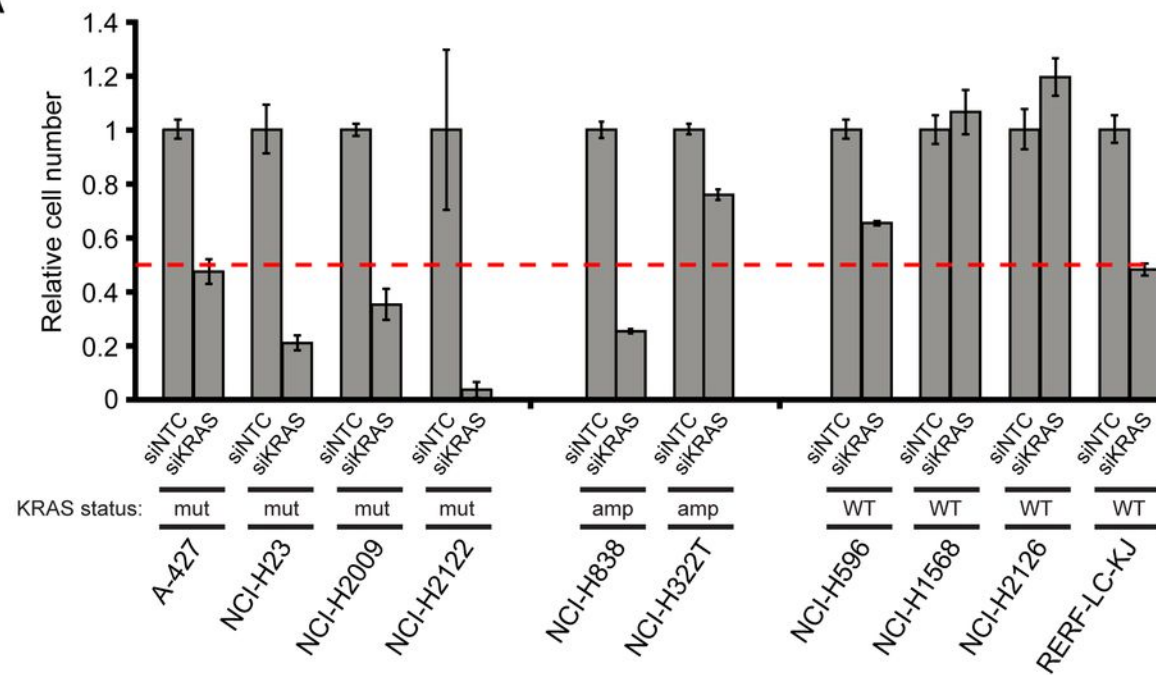

B

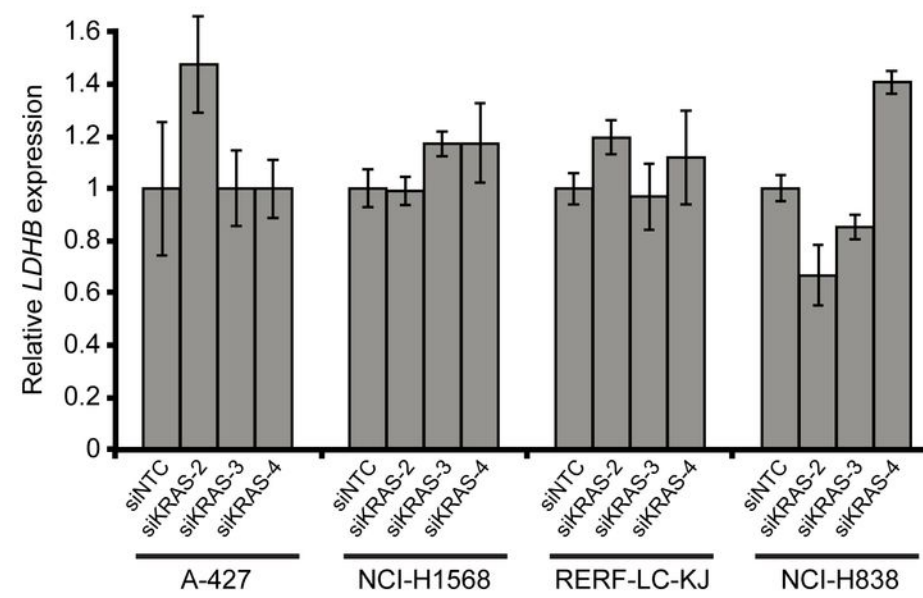

Supplement: 10780432ccr122638-sup-fig3.pdf [file 10780432ccr122638-sup-fig3.pdf]

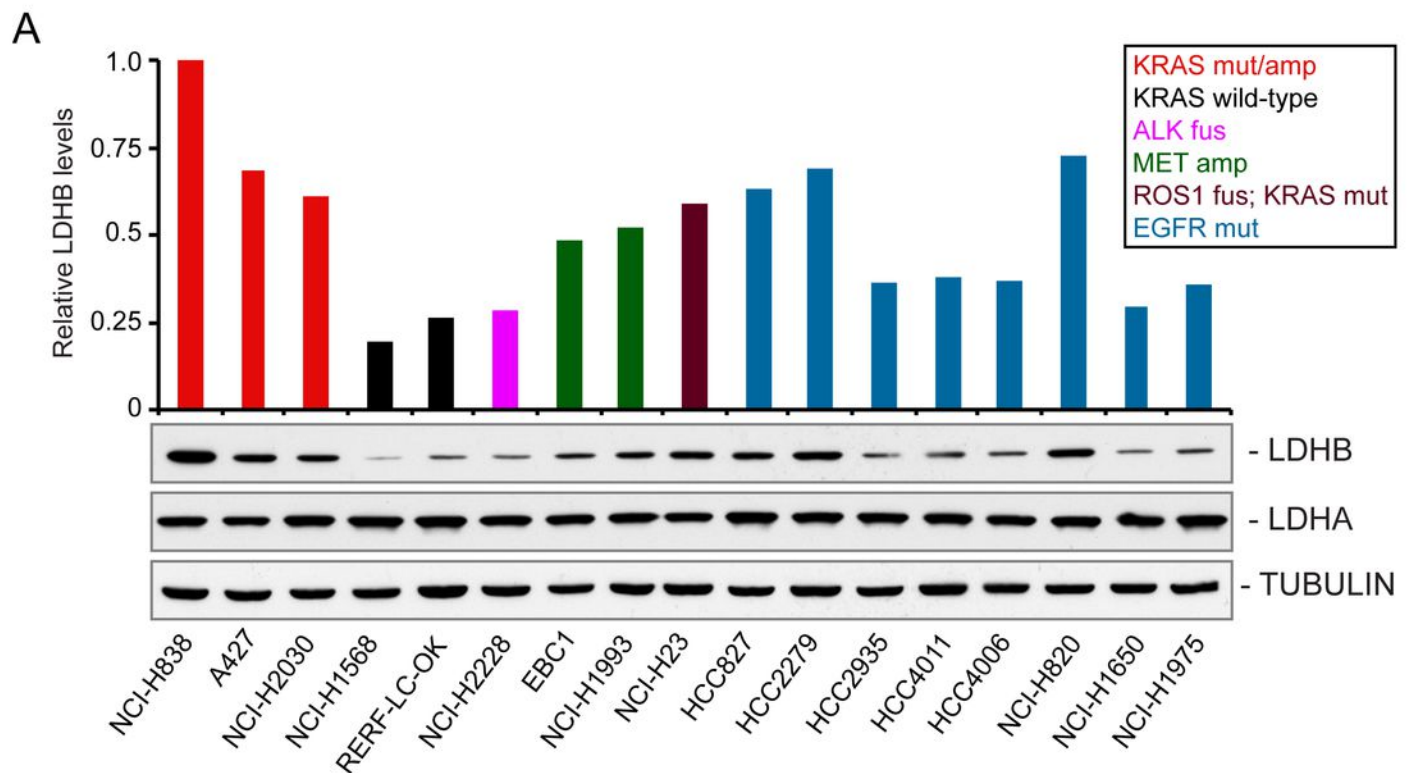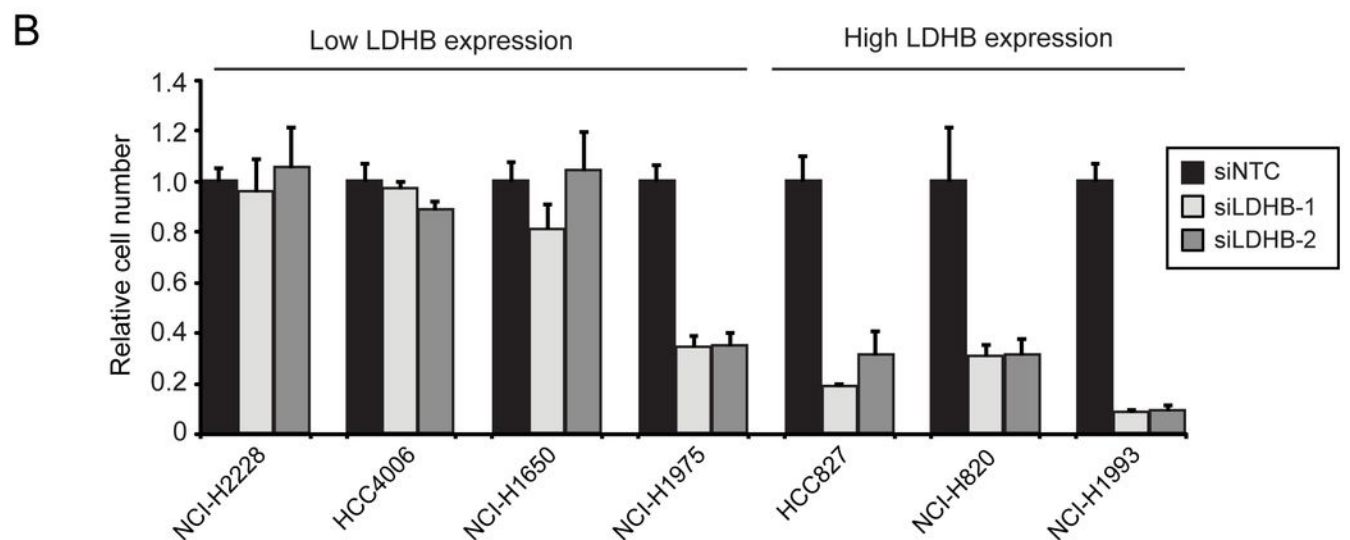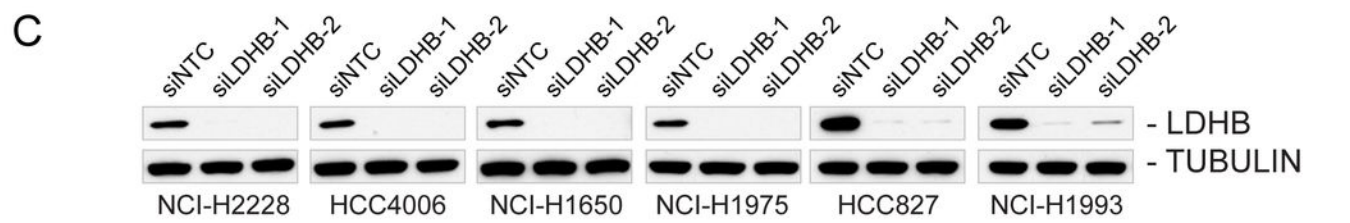

Supplement: 10780432ccr122638-sup-fig4.pdf [file 10780432ccr122638-sup-fig4.pdf]
